# Supplementary material
Source: PubMed Central journal article supplement (PMC4620027)
Supplement: NIHMS722841-supplement-Supp_data.pdf [file NIHMS722841-supplement-Supp_data.pdf]

## Supplementary Online Content

Harrison DM, Roy S, Oh J, et al. Association of cortical lesion burden on 7-T magnetic resonance imaging with cognition and disability in multiple sclerosis. *JAMA Neurol*. Published online July 20, 2015. doi:10.1001/jamaneurol.2015.1241.

**eTable 1.** Interrater and Intrarater Reliability of Cortical Lesion Identification

**eTable 2.** Prediction of Clinical Outcomes by MRI Outcome

**eTable 3.** Odds of Cognitive Impairment by Cortical Lesions and Conventional MRI Measures, Combined

**eTable 4.** Correlation of Cortical Lesions With Conventional MRI Measures

This supplementary material has been provided by the authors to give readers additional information about their work.

**eTable 1.** Interrater and Intrarater Reliability of Cortical Lesion Identification

| <b>Lin's Concordance Coefficient for:</b> | <b>Total Lesions</b> | <b>Leukocortical</b> | <b>Intracortical</b> | <b>Subpial</b> |
|-------------------------------------------|----------------------|----------------------|----------------------|----------------|
| Interrater Reliability                    | 0.54                 | 0.75                 | 0.34                 | 0.13           |
| Intrarater Reliability                    | 0.96                 | 0.86                 | 0.46                 | 0.86           |

Lesion counts from 10 sample scans performed by two independent raters were analyzed for inter-rater reliability for total lesion count and the individual lesion sub-types. Intra-rater reliability was assessed by having each rater rate the same scan twice. Lin's concordance correlation coefficient (range from -1 to 1) was calculated to statistically assess reliability.

**eTable 2.** Prediction of Clinical Outcomes by MRI Outcome

|                                                       | EDSS ≥ 5.0                 |              | Progressive Phenotype |       | Cognitive Impairment        |              |
|-------------------------------------------------------|----------------------------|--------------|-----------------------|-------|-----------------------------|--------------|
|                                                       | Odds Ratio                 | P            | Odds Ratio            | P     | Odds ratio                  | P            |
| Age + Gender                                          | <b>1.15* (1.01 – 1.33)</b> | <b>0.034</b> | 1.07 (0.95 – 1.20)    | 0.269 | <b>1.09* (1.01 – 1.18)</b>  | <b>0.031</b> |
| Total Cortical Lesion Count                           | 1.04 (0.98 - 1.10)         | 0.190        | 1.04 (0.99 - 1.10)    | 0.130 | 1.02 (0.97 - 1.06)          | 0.441        |
| Log [Total Cortical Lesion Volume]                    | 2.19 (0.65 - 7.43)         | 0.207        | 1.77 (0.55 - 5.69)    | 0.339 | <b>3.36* (1.07 - 10.59)</b> | <b>0.038</b> |
| Leukocortical Lesion Count                            | 1.06 (0.94 - 1.183)        | 0.353        | 1.09 (0.98 - 1.22)    | 0.119 | 1.09 (1.00 - 1.19)          | 0.054        |
| Log [Leukocortical Lesion Volume]                     | 1.73 (0.72 - 4.16)         | 0.218        | 1.63 (0.67 - 3.99)    | 0.282 | <b>9.65* (1.70 - 54.59)</b> | <b>0.010</b> |
| Intracortical Lesion Count                            | 1.06 (0.92 - 1.21)         | 0.415        | 1.10 (0.95 - 1.26)    | 0.193 | 1.00 (0.89 - 1.11)          | 0.965        |
| Log [Intracortical Lesion Volume]                     | 1.40 (0.62 - 3.17)         | 0.422        | 1.44 (0.59 - 3.5)     | 0.423 | 0.46 (0.17 - 1.25)          | 0.129        |
| Subpial Lesion Count                                  | 1.11 (0.96 - 1.29)         | 0.147        | 1.06 (0.94 - 1.19)    | 0.344 | 0.96 (0.87 - 1.07)          | 0.494        |
| Log [Subpial Lesion Volume]                           | 1.57 (0.51 - 4.82)         | 0.430        | 1.01 (0.35 - 2.86)    | 0.990 | 0.87 (0.37 - 2.07)          | 0.757        |
| BPF %                                                 | 0.87 (0.71 - 1.08)         | 0.213        | 0.95 (0.77 - 1.17)    | 0.611 | 0.93 (0.77 - 1.11)          | 0.414        |
| Cerebral White Matter Volume %                        | 0.88 (0.71 - 1.10)         | 0.274        | 0.94 (0.76 - 1.15)    | 0.531 | 0.76 (0.57 - 1.00)          | 0.053        |
| Cortical Gray Matter Volume %                         | 1.07 (0.77 - 1.47)         | 0.703        | 1.06 (0.76 - 1.47)    | 0.735 | 1.23 (0.89 - 1.70)          | 0.207        |
| Log [White Matter Lesion Volume]                      | 2.02 (0.30 - 13.71)        | 0.470        | 0.39 (0.08 - 1.90)    | 0.244 | 1.07 (0.35 - 3.33)          | 0.901        |
| Cortical Lesion Subtype Ratio – Count                 | 0.99 (0.73 - 1.36)         | 0.966        | 1.20 (0.87 - 1.66)    | 0.262 | 1.30 (0.97 - 1.75)          | 0.084        |
| Cortical Lesion Subtype Ratio – Volume                | 0.95 (0.79 - 1.14)         | 0.582        | 0.96 (0.81 - 1.12)    | 0.579 | <b>1.50* (1.00 - 2.25)</b>  | <b>0.048</b> |
| Cortical Lesion to White Matter Lesion Burden Ratio % | 0.34 (0.84 – 1.17)         | 0.900        | 1.20 (0.92 – 1.55)    | 0.175 | 1.05 (0.87 – 1.28)          | 0.609        |

Logistic regression model for prediction of clinical outcome. Initial model shown for prediction by age and gender, followed by prediction by MRI outcome, adjusted for age and gender. Odds ratio (%95 CI) reported. Odds ratio for lesion counts represent the increase in odds for assignment to clinical category for each increase in lesion count. Normalized volumes were log transformed before regression, and thus reported odds ratios for normalized lesion volumes represent the increase in odds for each log increase in normalized volume ( $e^{\sim 2.718 \times \text{normalized volume value}}$ ). BPF, WM volume, GM volume, and CL/WML Burden Ratio were converted to % prior to regression, and thus odds ratios represent the increase in odds for each 1% increase in these quantities. \* =  $p < 0.05$ .

**eTable 3.** Odds of Cognitive Impairment by Cortical Lesions and Conventional MRI Measures, Combined

| Base model                         |                                       |              | Base model + Cerebral WM Volume %    |              | Base model + Cortical GM Volume %        |              | Base model + log [WM Lesion Volume]     |              | Base model + Cerebral WM Volume % + Cortical GM Volume % + log [WM Lesion Volume] |              |
|------------------------------------|---------------------------------------|--------------|--------------------------------------|--------------|------------------------------------------|--------------|-----------------------------------------|--------------|-----------------------------------------------------------------------------------|--------------|
|                                    | Odds ratio                            | P            | Odds ratio                           | P            | Odds ratio                               | P            | Odds ratio                              | P            | Odds ratio                                                                        | P            |
| Total Cortical Lesion Count        | 1.02<br>(0.97 - 1.06)                 | 0.441        | 1.00<br>(0.94 - 1.05)                | 0.888        | 1.03<br>(0.98 - 1.09)                    | 0.221        | 1.02<br>(0.97 - 1.07)                   | 0.399        | 1.01<br>(0.94 - 1.07)                                                             | 0.862        |
| Log [Total Cortical Lesion Volume] | <b>3.36*</b><br><b>(1.07 - 10.59)</b> | <b>0.038</b> | 3.75<br>(0.93 - 15.07)               | 0.063        | <b>17.25*</b><br><b>(1.18 - 252.52)</b>  | <b>0.038</b> | 1.07<br>(0.35 - 3.33)                   | 0.901        | <b>14.26*</b><br><b>(1.06 - 192.37)</b>                                           | <b>0.045</b> |
| Leukocortical Lesion Count         | 1.09<br>(1.00 - 1.19)                 | 0.054        | 1.07<br>(0.97 - 1.19)                | 0.191        | <b>1.11*</b><br><b>(1.01 - 1.23)</b>     | <b>0.033</b> | <b>1.13*</b><br><b>(1.01 - 1.26)</b>    | <b>0.039</b> | 1.11<br>(0.98 - 1.25)                                                             | 0.088        |
| Log [Leukocortical Lesion Volume]  | <b>9.65*</b><br><b>(1.70 - 54.59)</b> | <b>0.010</b> | 37.23<br>(0.77 - 1796.93)            | 0.067        | <b>42.87*</b><br><b>(1.43 - 1288.34)</b> | <b>0.030</b> | <b>17.36*</b><br><b>(1.26 - 238.59)</b> | <b>0.033</b> | <b>40.96*</b><br><b>(1.23 - 1369.23)</b>                                          | <b>0.038</b> |
| Intracortical Lesion Count         | 1.00<br>(0.89 - 1.11)                 | 0.965        | 0.91<br>(0.78 - 1.05)                | 0.204        | 1.00<br>(0.89 - 1.13)                    | 0.939        | 1.00<br>(0.89 - 1.12)                   | 0.956        | 0.91<br>(0.78 - 1.06)                                                             | 0.222        |
| Log [Intracortical Lesion Volume]  | 0.46<br>(0.17 - 1.25)                 | 0.129        | <b>0.08*</b><br><b>(0.01 - 0.97)</b> | <b>0.047</b> | 0.37<br>(0.10 - 1.32)                    | 0.124        | 0.17<br>(0.02 - 1.20)                   | 0.075        | 0.01<br>(<0.01 - 1.94)                                                            | 0.085        |
| Subpial Lesion Count               | 0.96 (0.87 - 1.07)                    | 0.494        | 0.91 (0.78 - 1.05)                   | 0.194        | 1.00 (0.88 - 1.13)                       | 0.961        | 0.97 (0.87 - 1.08)                      | 0.563        | 0.89 (0.74 - 1.06)                                                                | 0.197        |
| Log [Subpial Lesion Volume]        | 0.87 (0.37 - 2.07)                    | 0.757        | 0.94 (0.40 - 2.18)                   | 0.880        | 0.94 (0.40 - 2.24)                       | 0.894        | 1.08 (0.45 - 2.57)                      | 0.869        | 1.05 (0.42 - 2.66)                                                                | 0.913        |

Logistic regression model for prediction of cognitive impairment. Base model shown for prediction by cortical lesion count or volume, adjusted for age and gender. Subsequent models for prediction of cognitive impairment by base model plus cerebral WM volume, cortical GM volume, WM lesion volume, or all 3 combined. Odds ratio (%95 CI) reported. \* = p < 0.05.

**eTable 4.** Correlation of Cortical Lesions With Conventional MRI Measures

|                              | <b>BPF</b>    | <b>WM Volume</b> | <b>Cortical GM Volume</b> | <b>WM Lesion Volume</b> |
|------------------------------|---------------|------------------|---------------------------|-------------------------|
| Total Cortical Lesion Volume | <b>-0.50*</b> | -0.22            | <b>-0.42*</b>             | 0.34                    |
| Leukocortical Lesion Volume  | <b>-0.53*</b> | -0.30            | -0.33                     | <b>0.50*</b>            |
| Intracortical Lesion Volume  | <b>-0.43*</b> | <b>-0.35*</b>    | -0.13                     | 0.19                    |
| Subpial Lesion Volume        | -0.21         | <0.01            | <b>-0.36*</b>             | -0.04                   |

Spearman correlation was performed between variables. Rho values shown. \* =  $p < 0.05$ .
